# Supplementary material
Source: publisher site journal article supplement (https://www.dovepress.com/article/334245)

Figure S1. K-M plot showing the prognostic value of 46 selected genes.

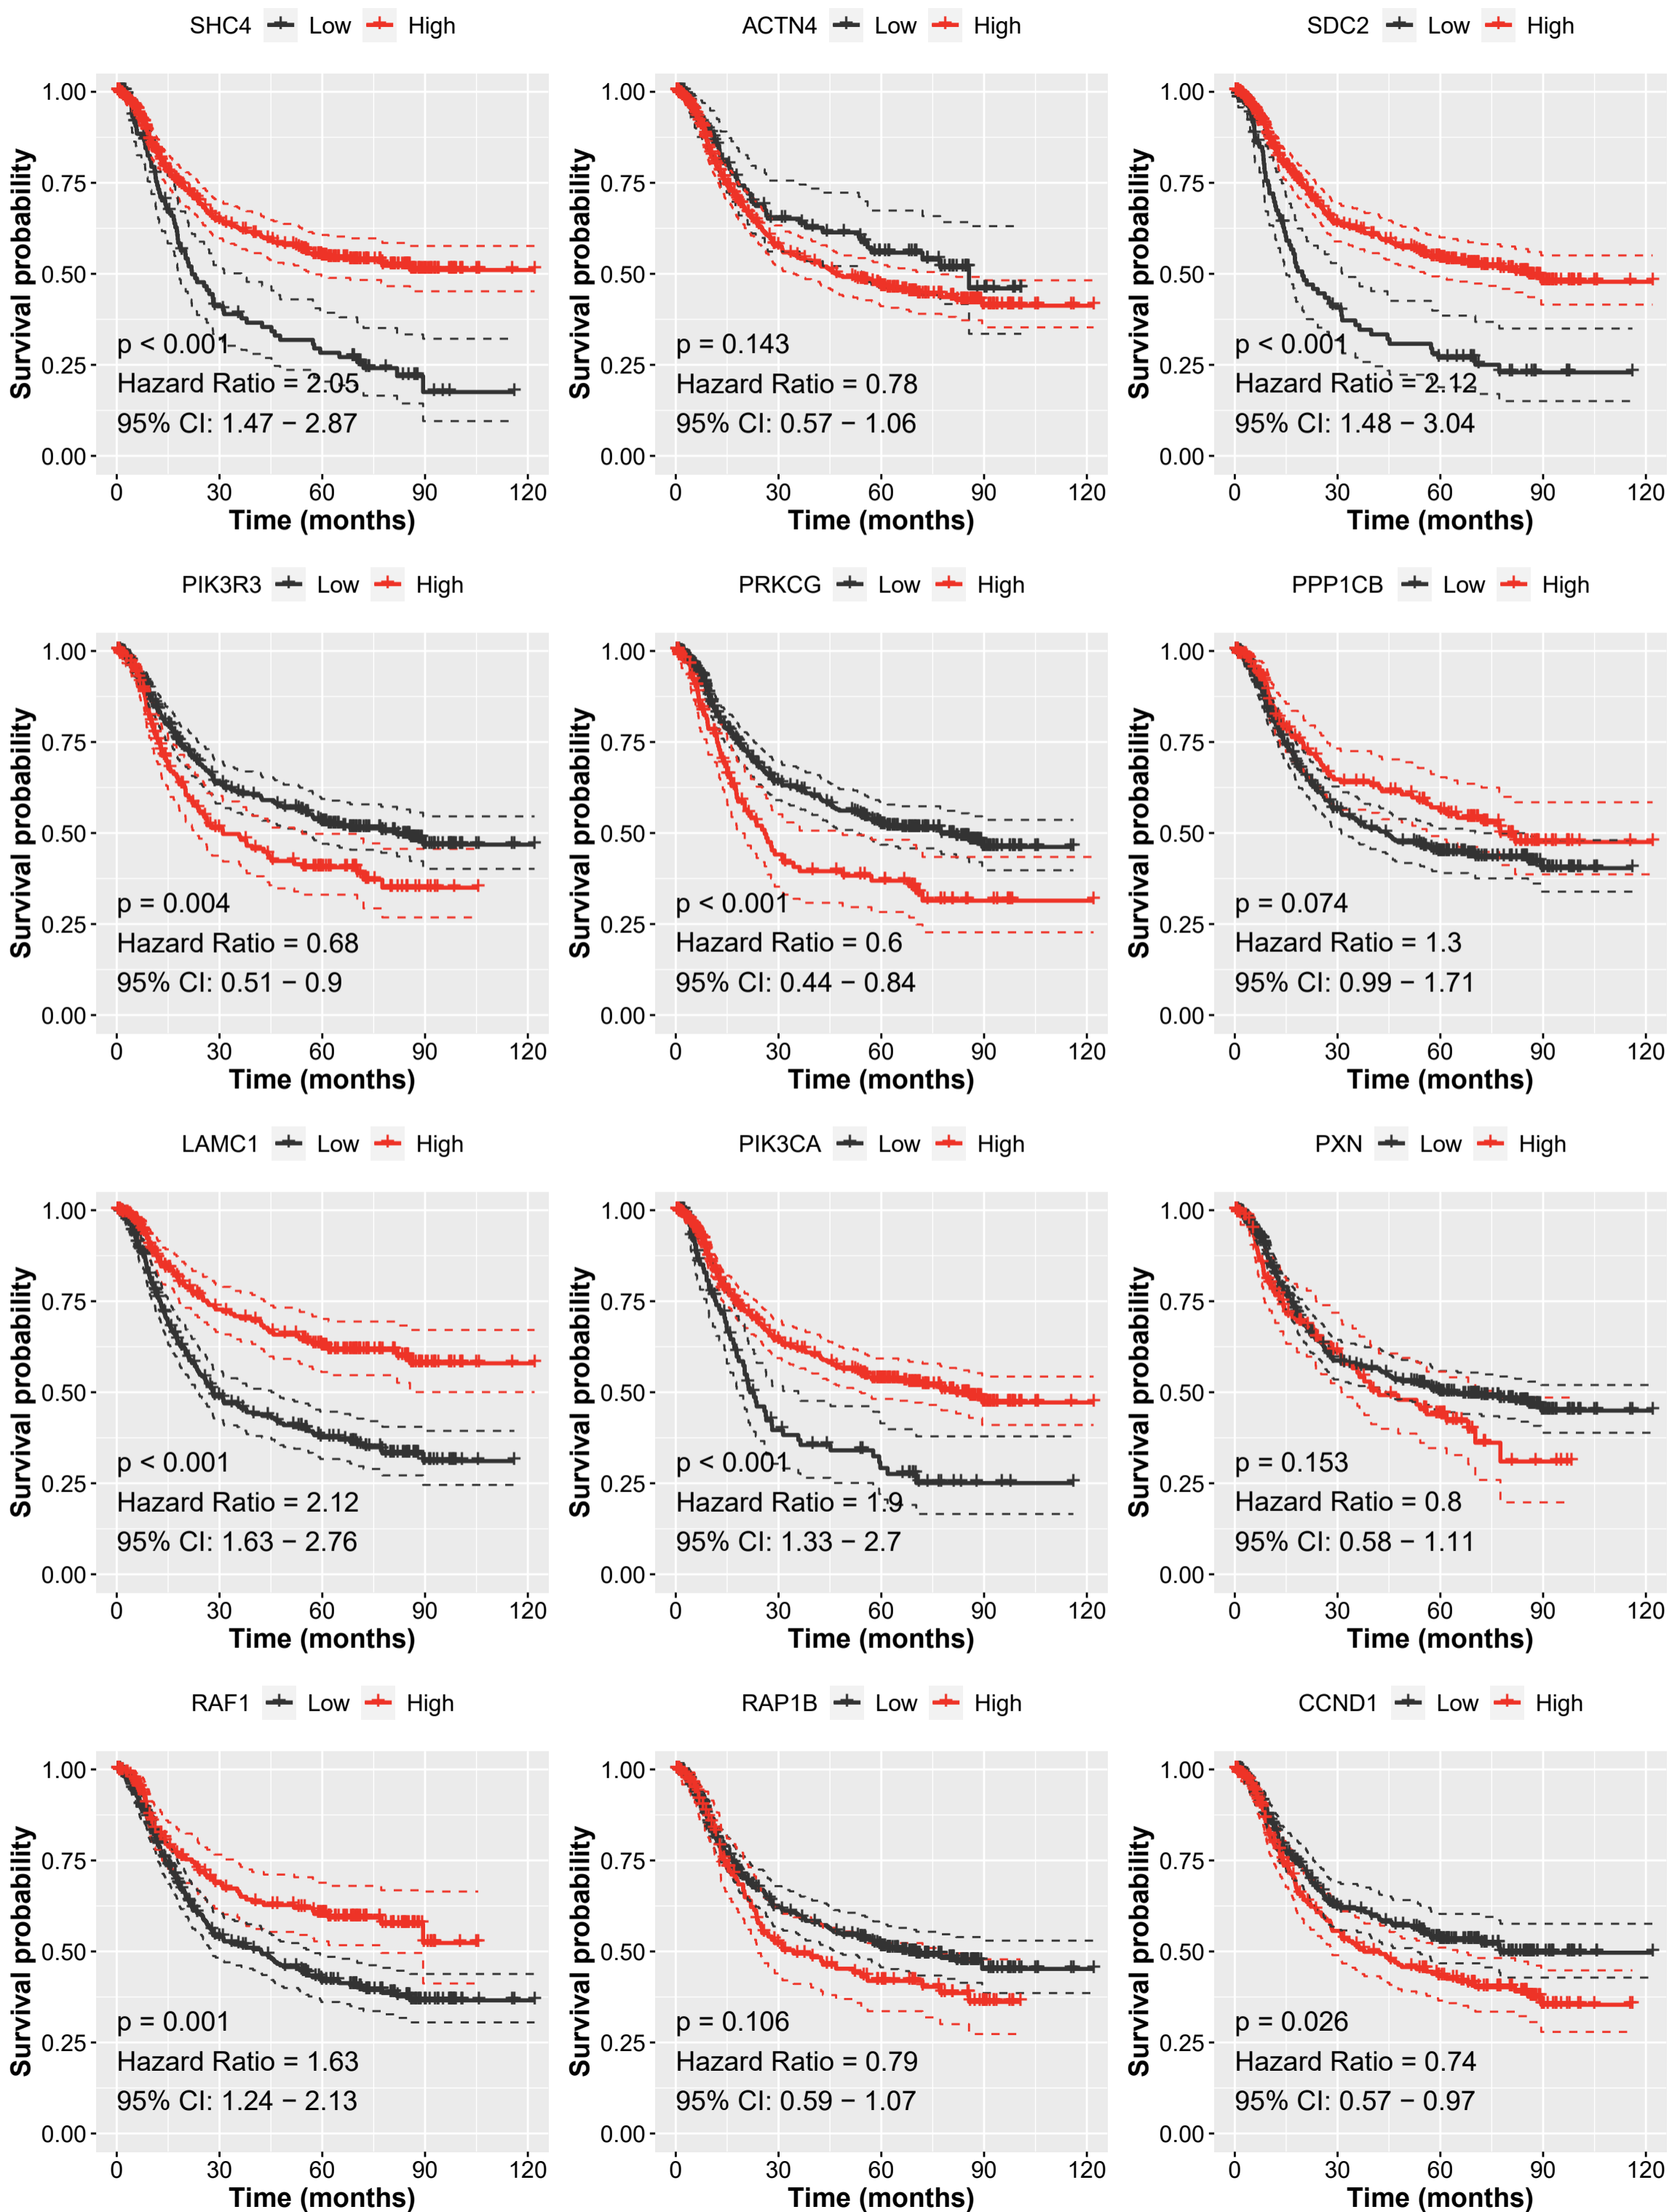

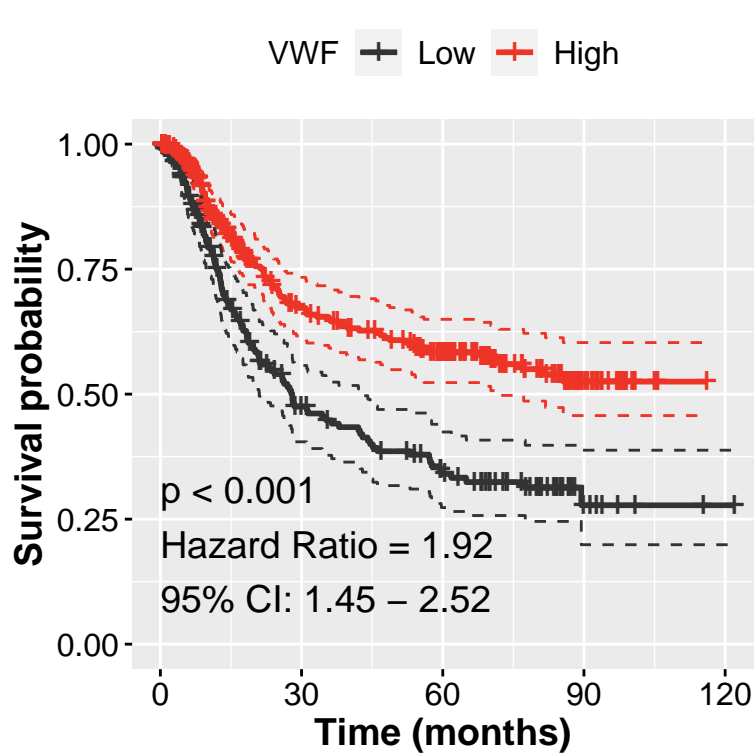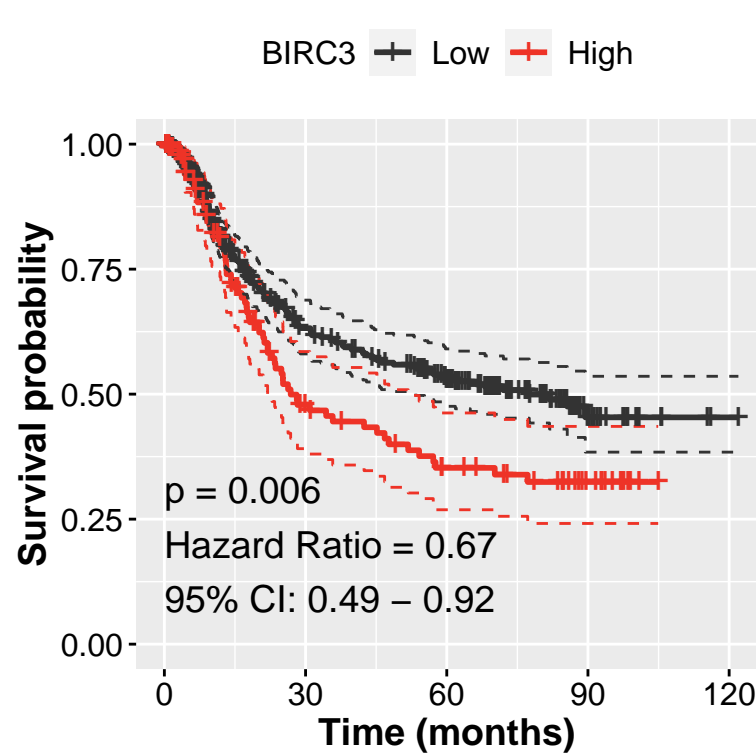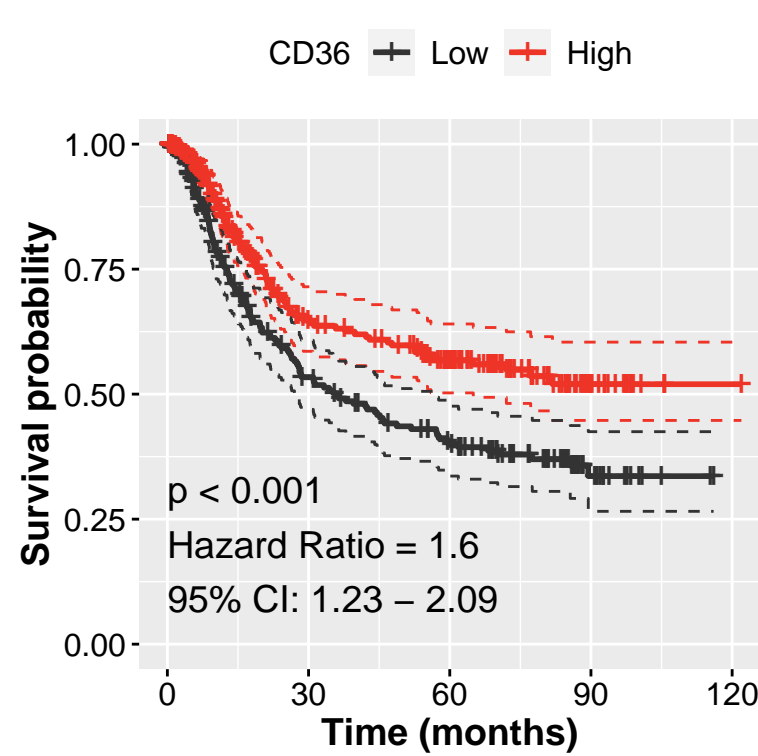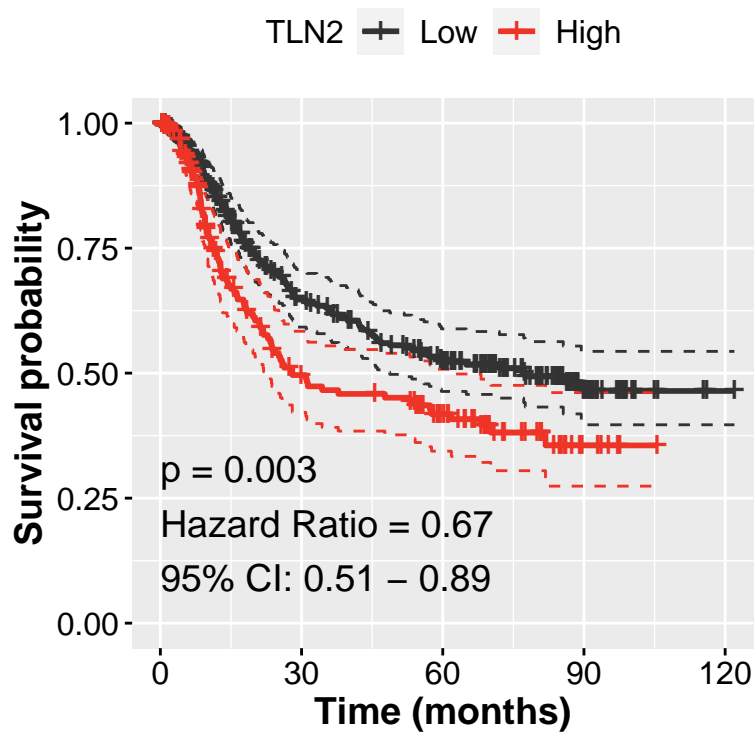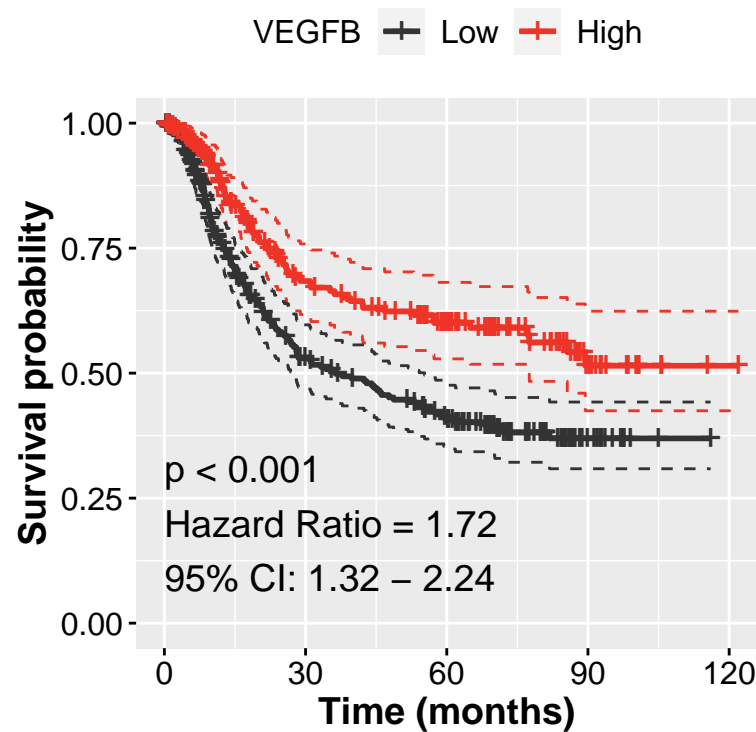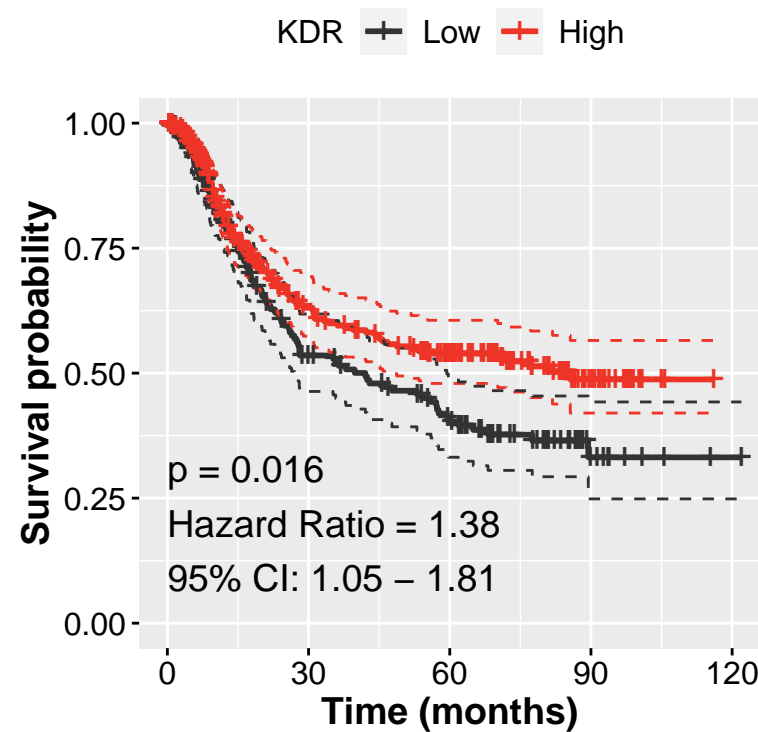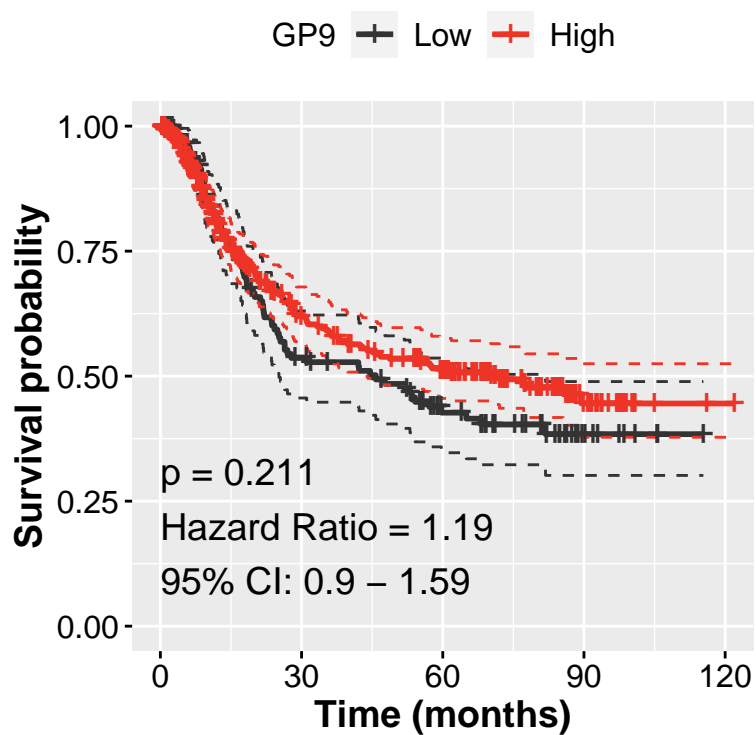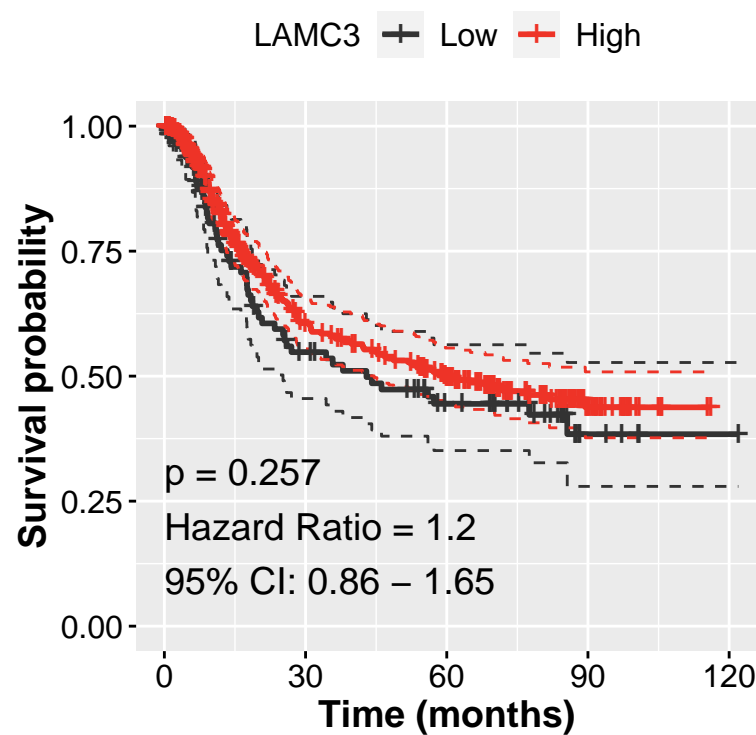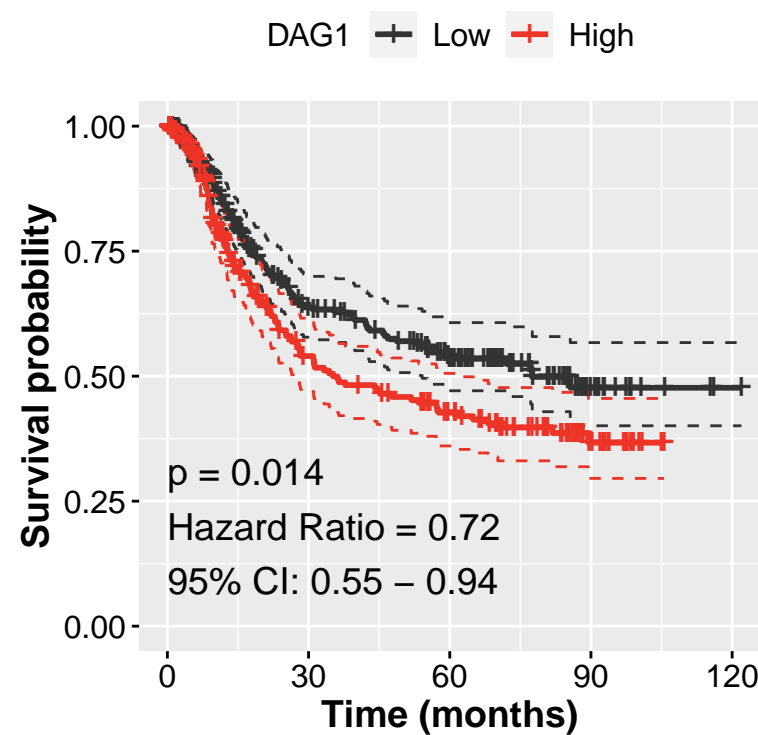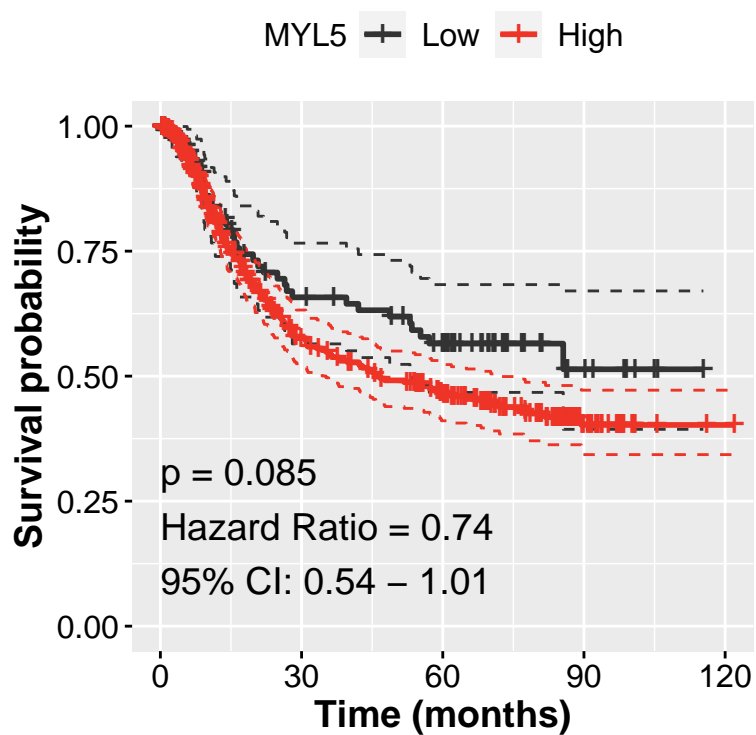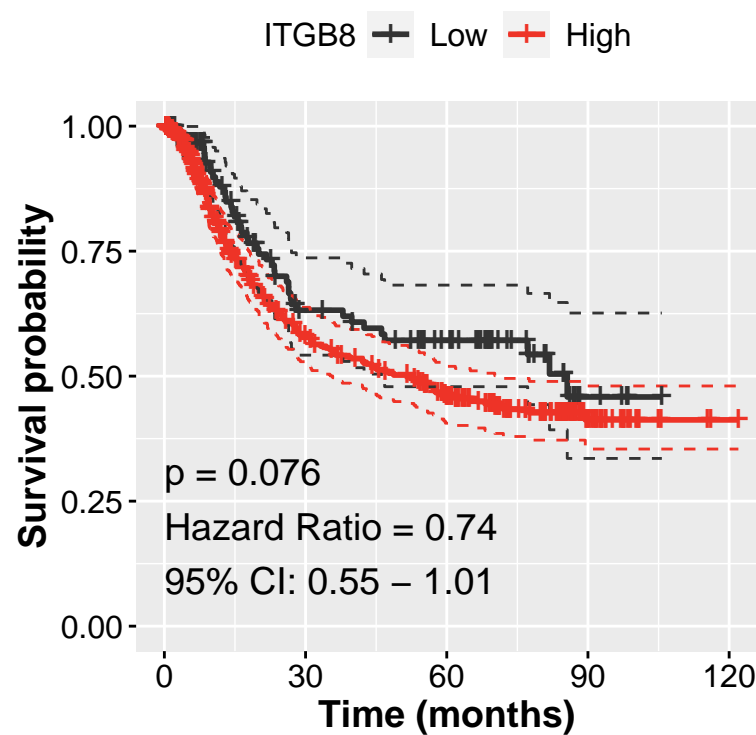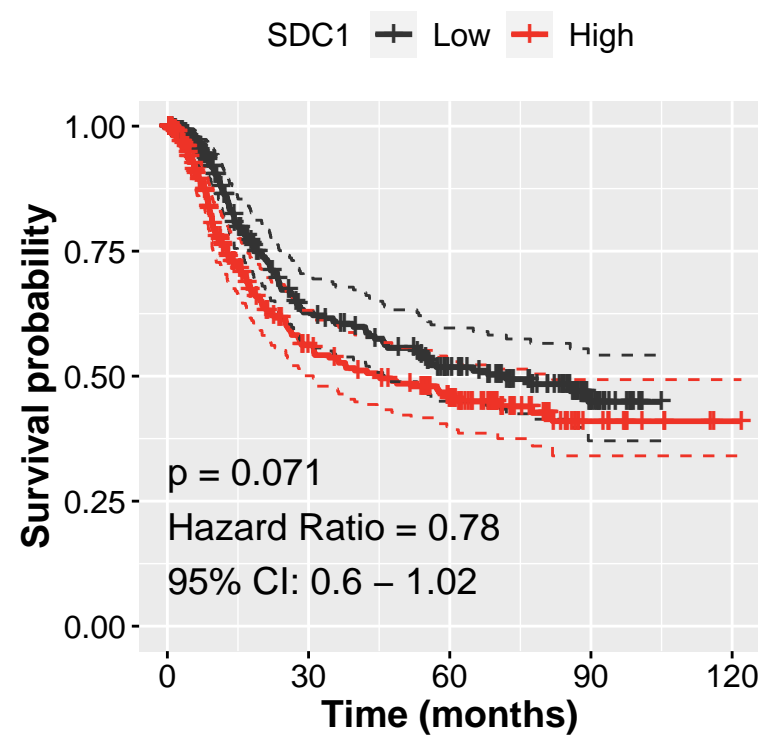

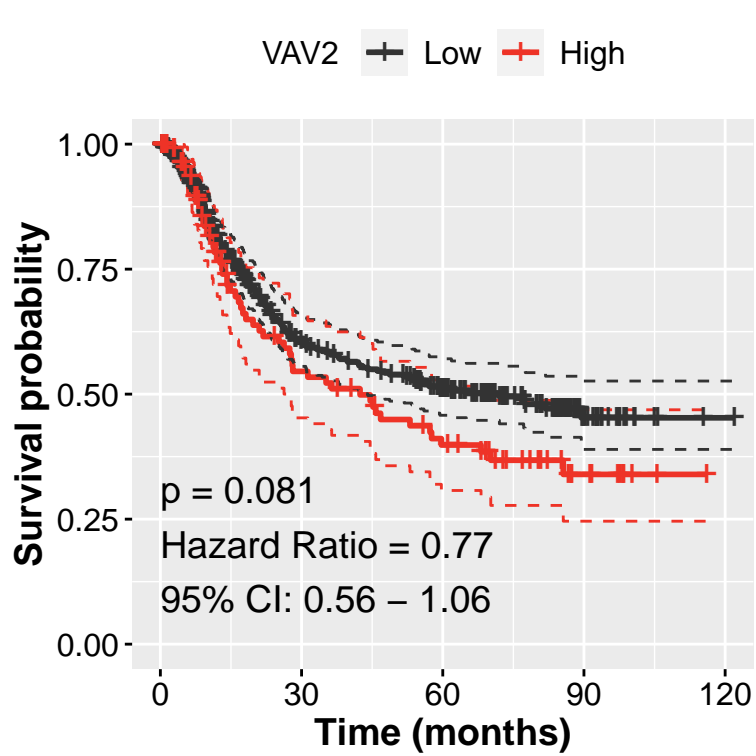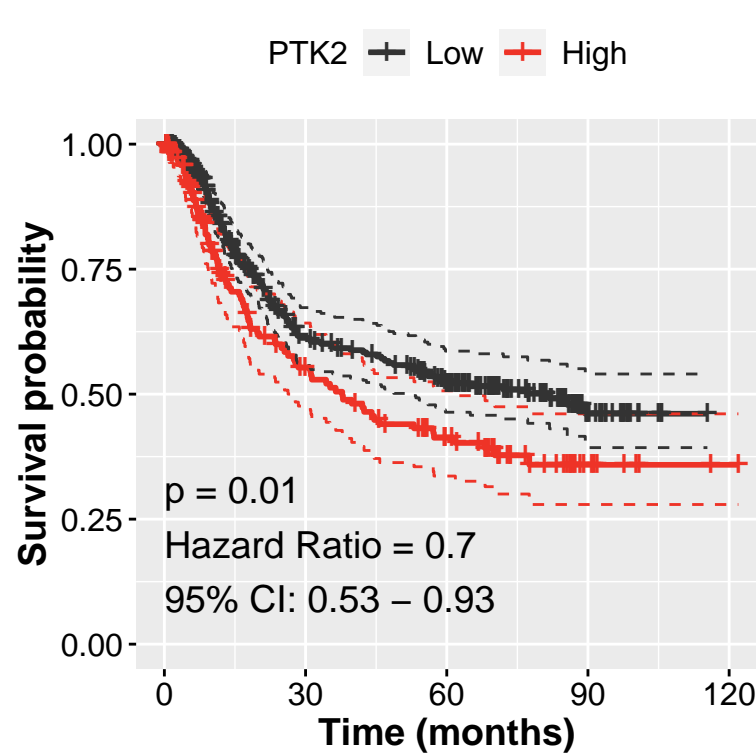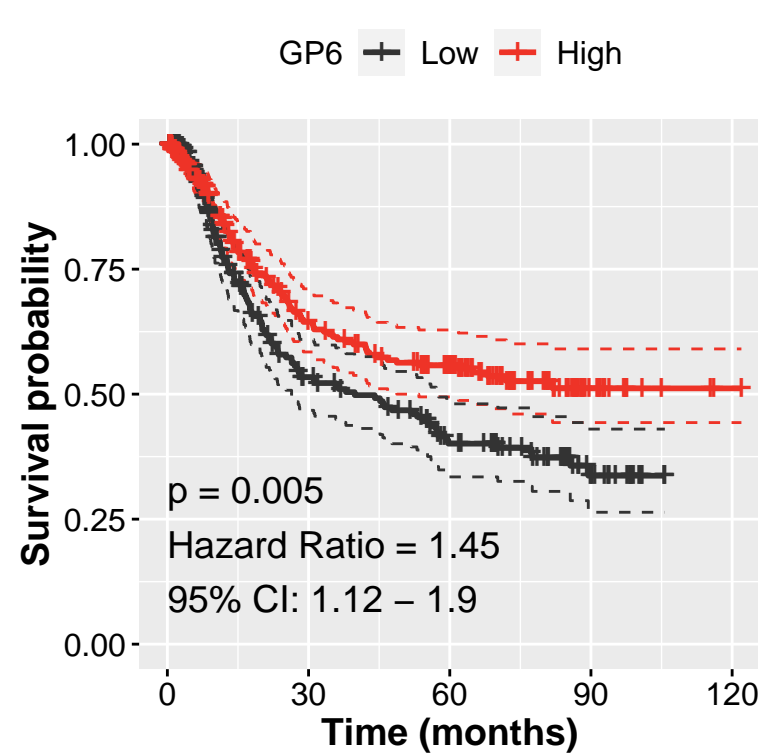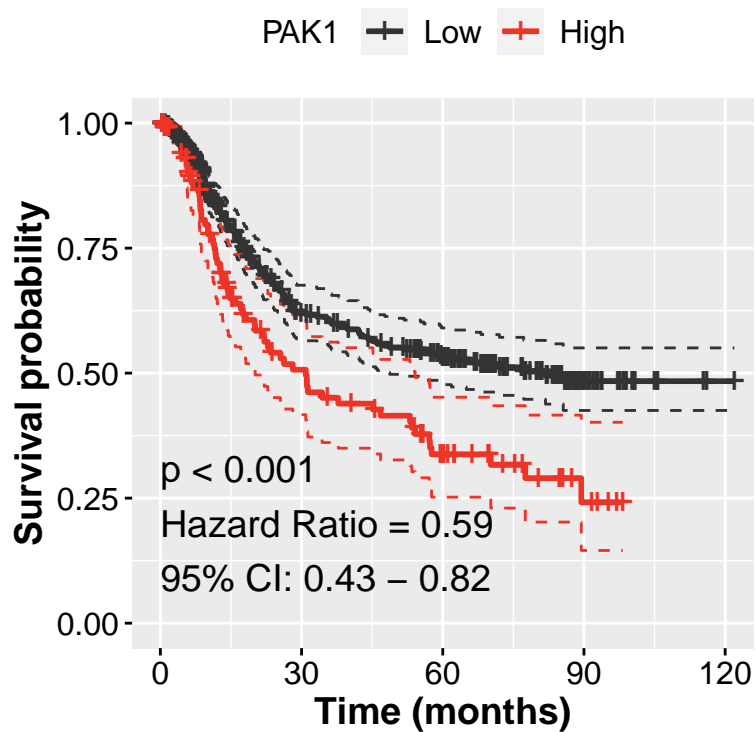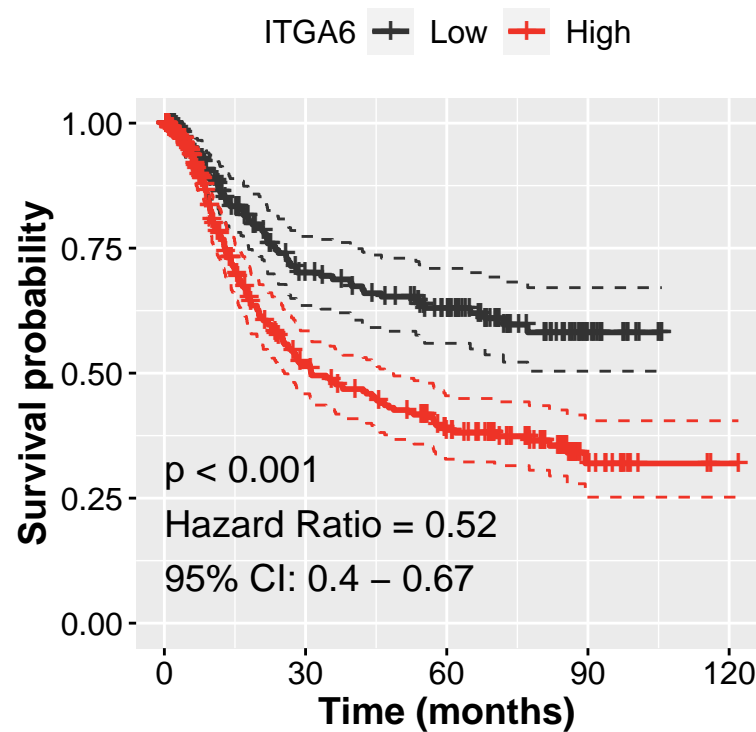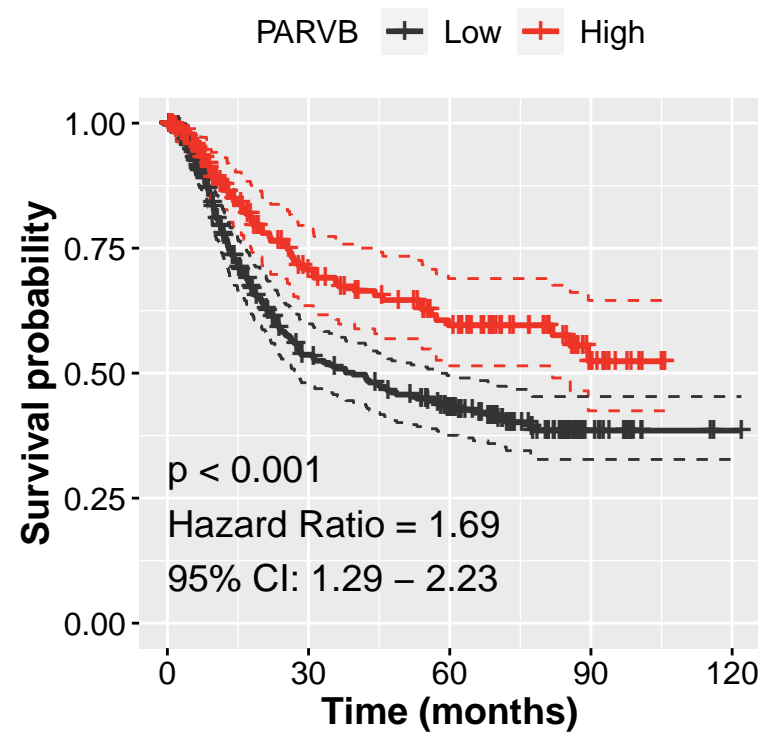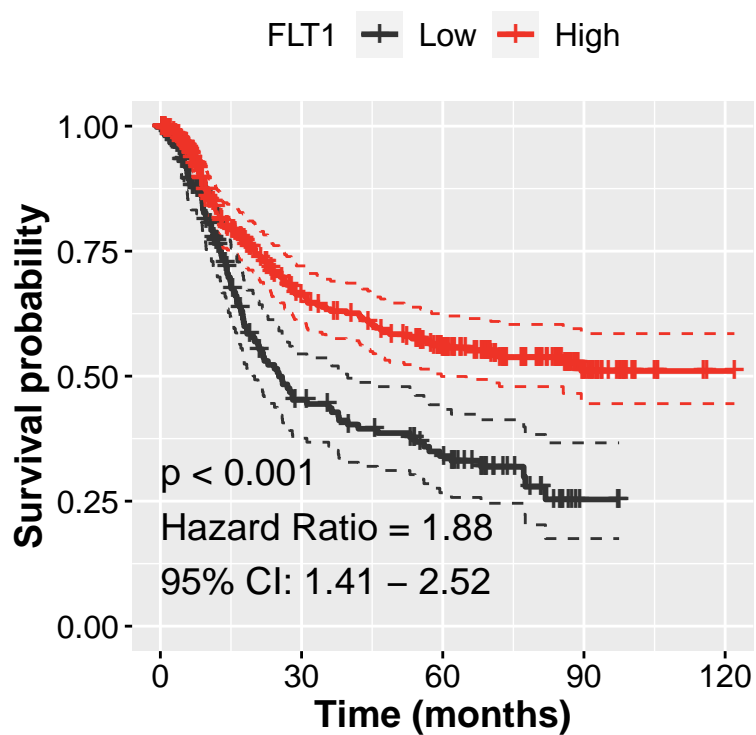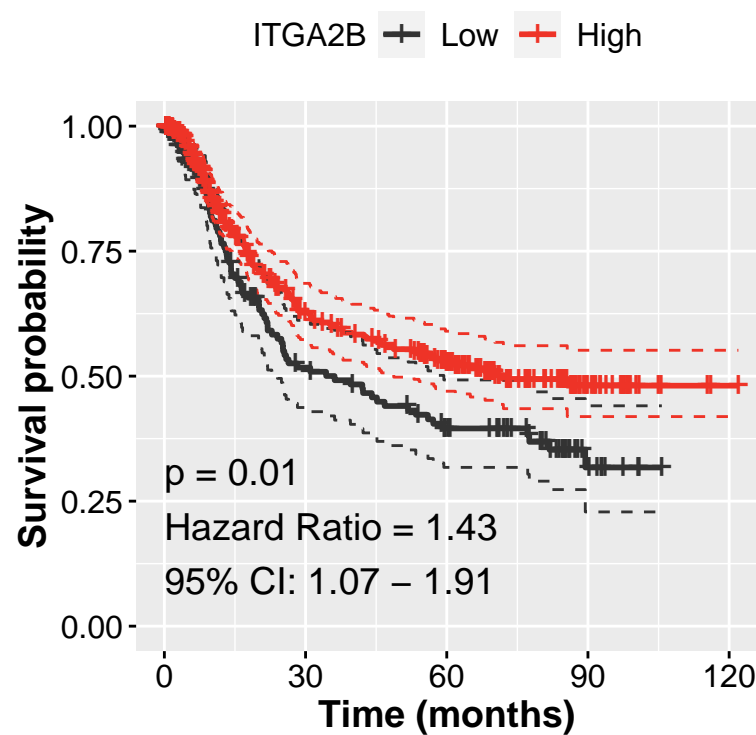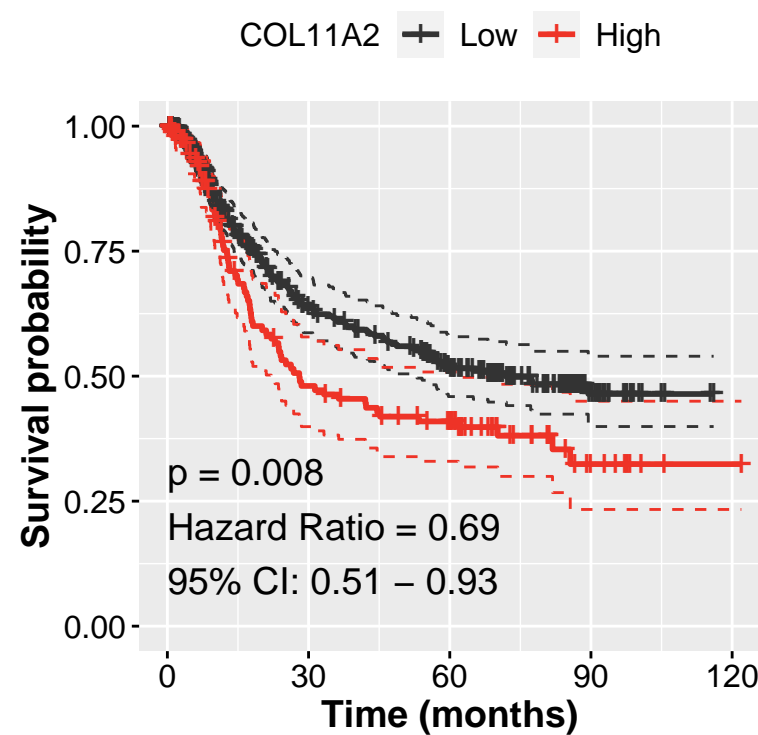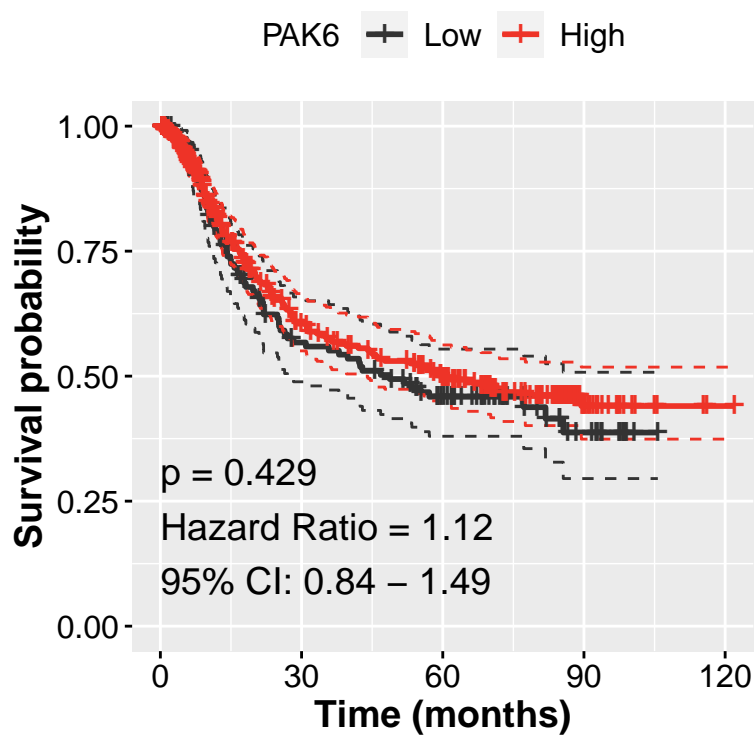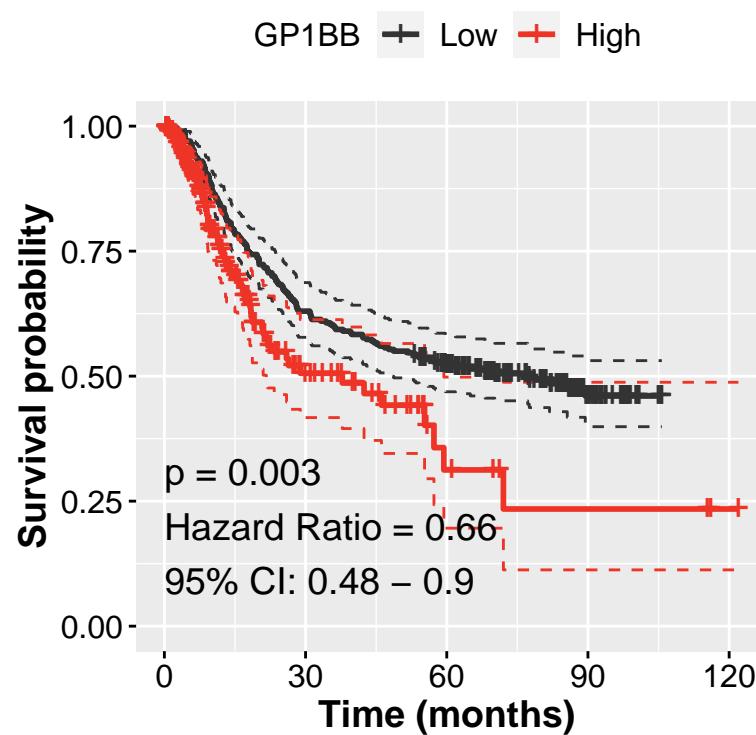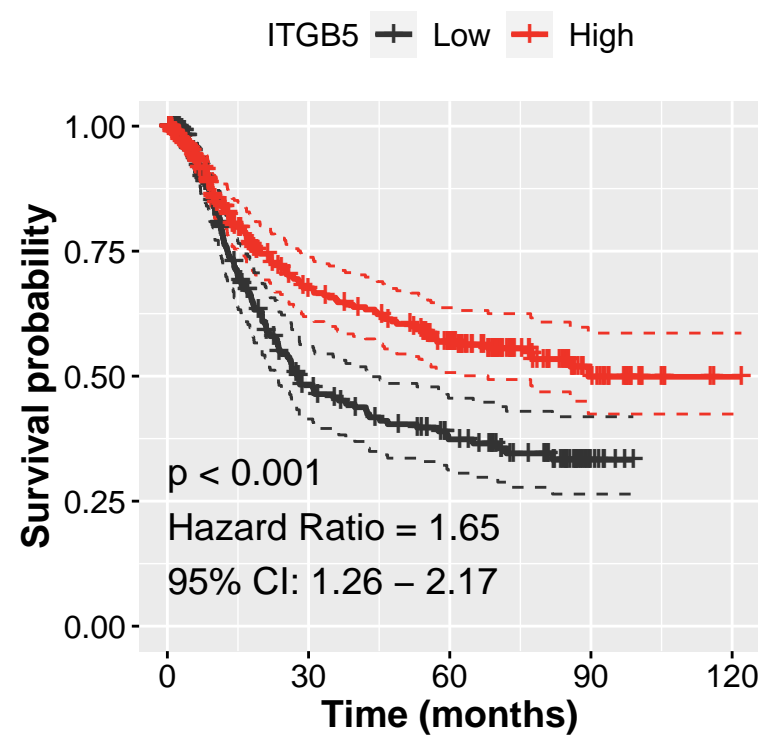

ITGA8 + Low + High

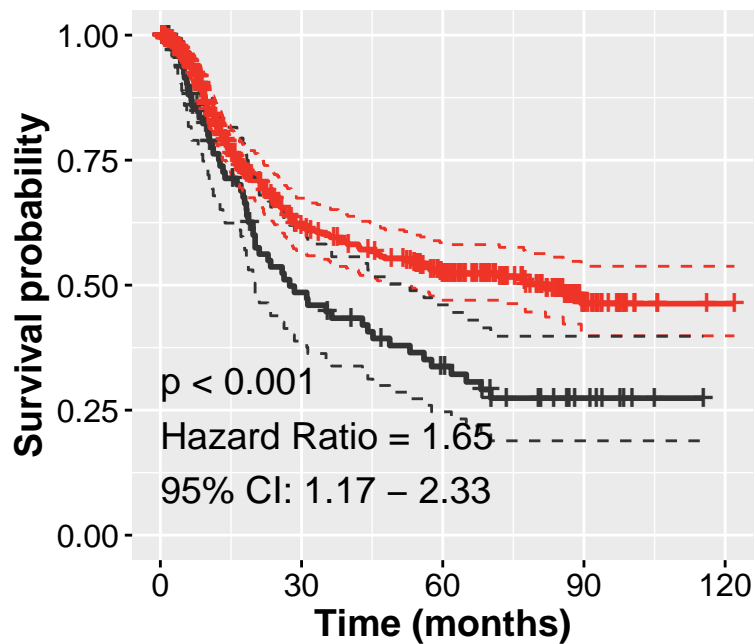

VAV3 + Low + High

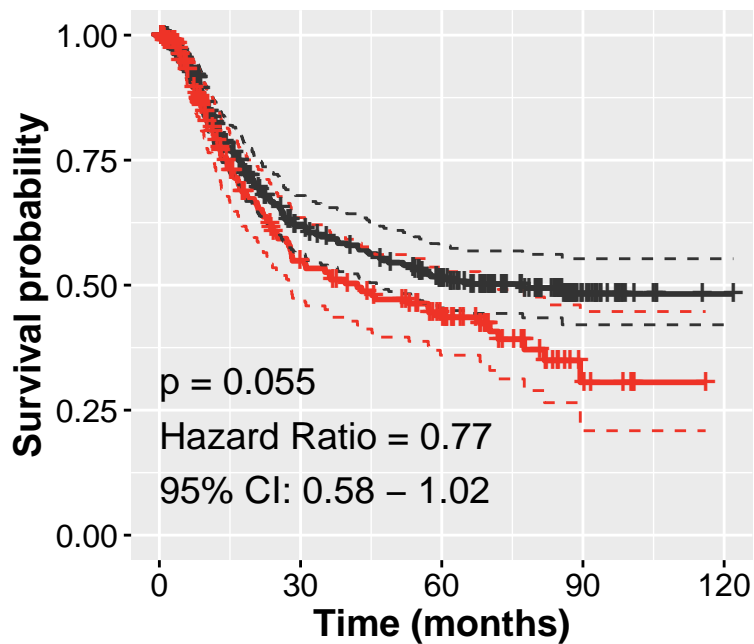

ROCK2 + Low + High

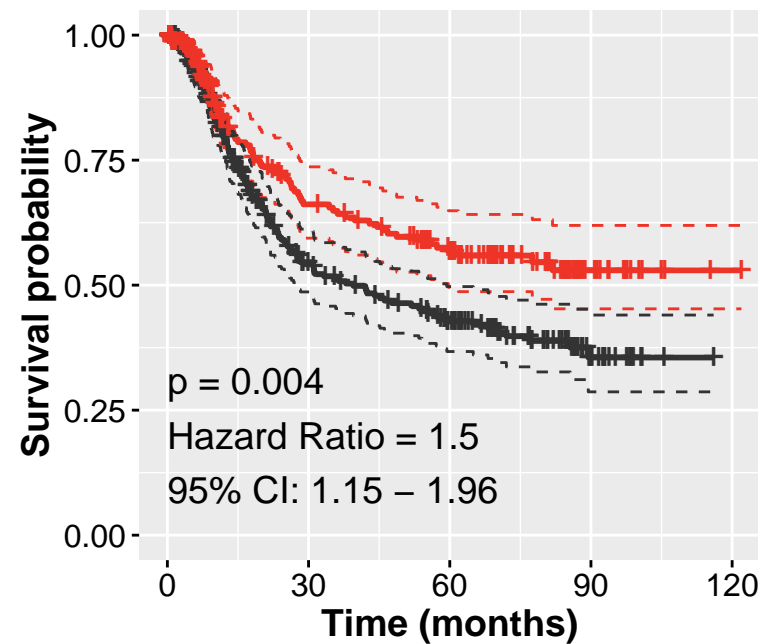

PIK3CB + Low + High

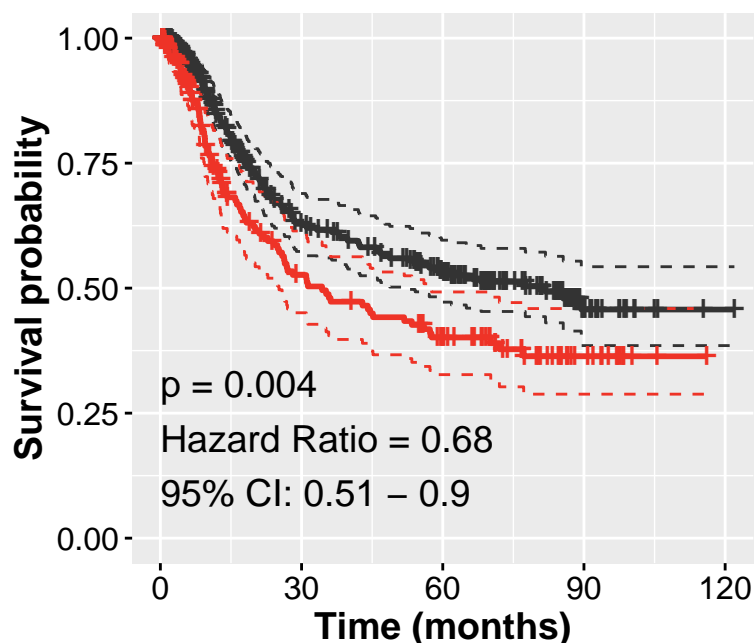

CTNNB1 + Low + High

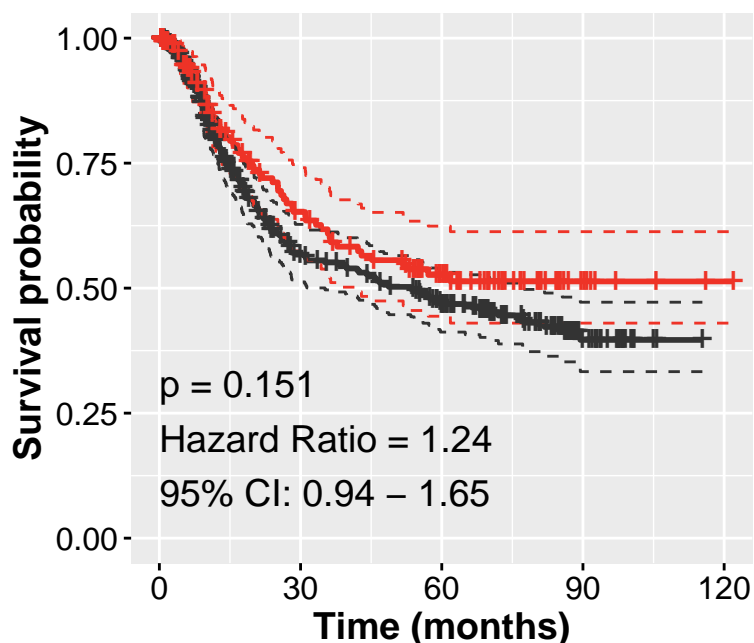

TNN + Low + High

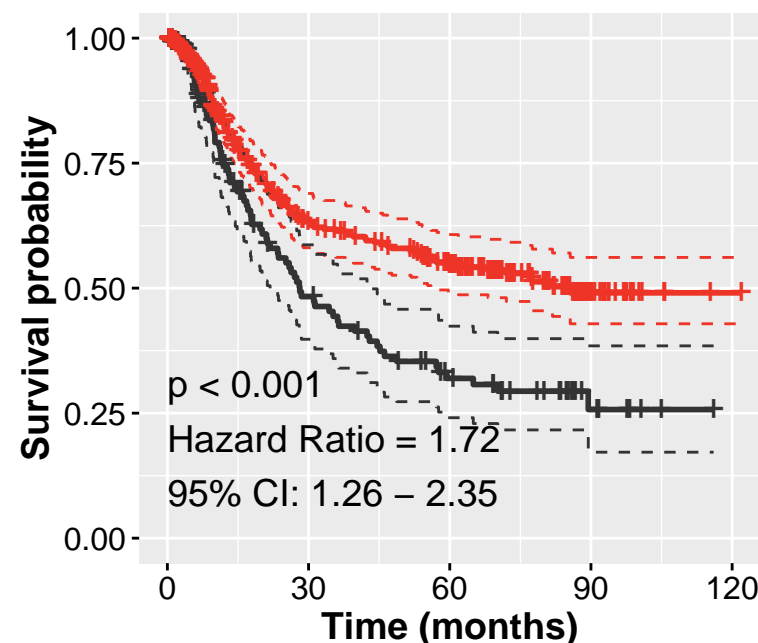

EGF + Low + High

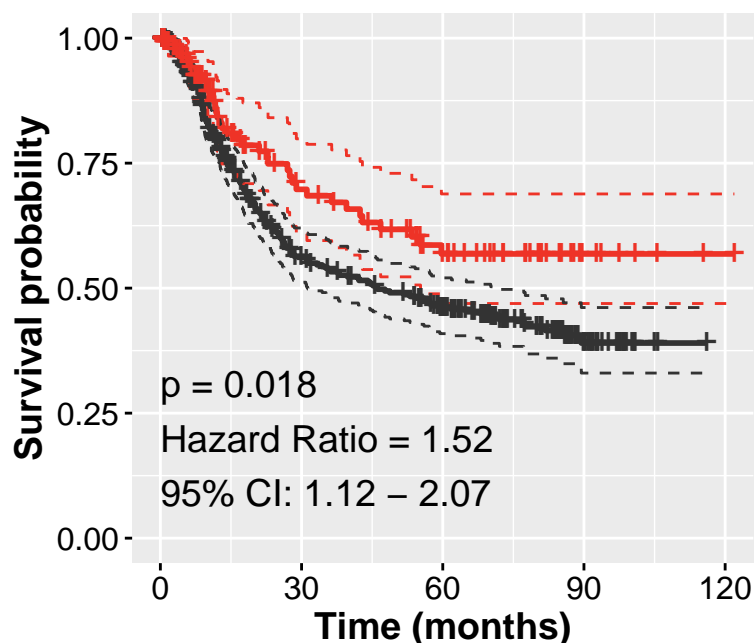

ITGA11 + Low + High

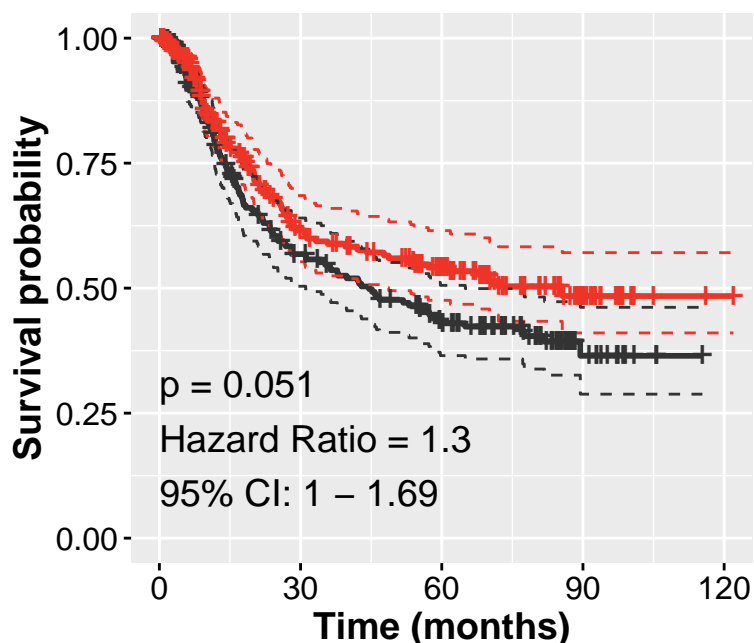

RAPGEF1 + Low + High

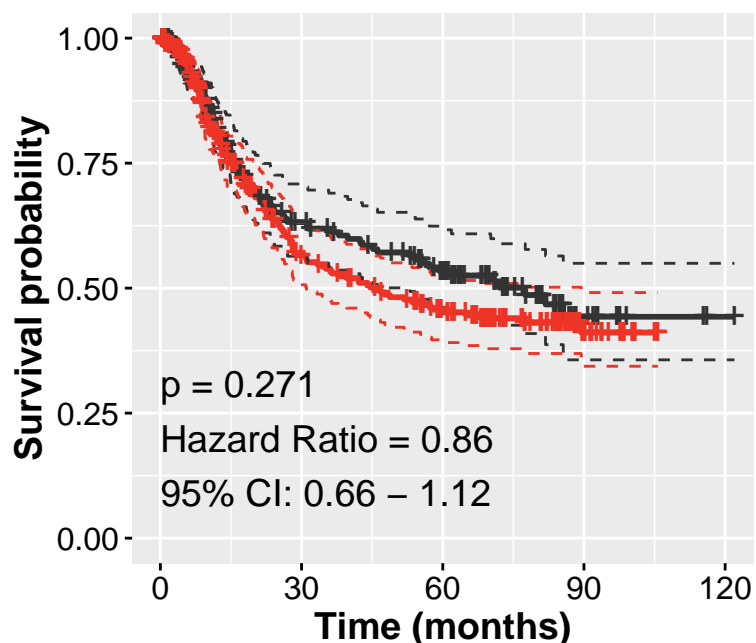

SHC3 + Low + High

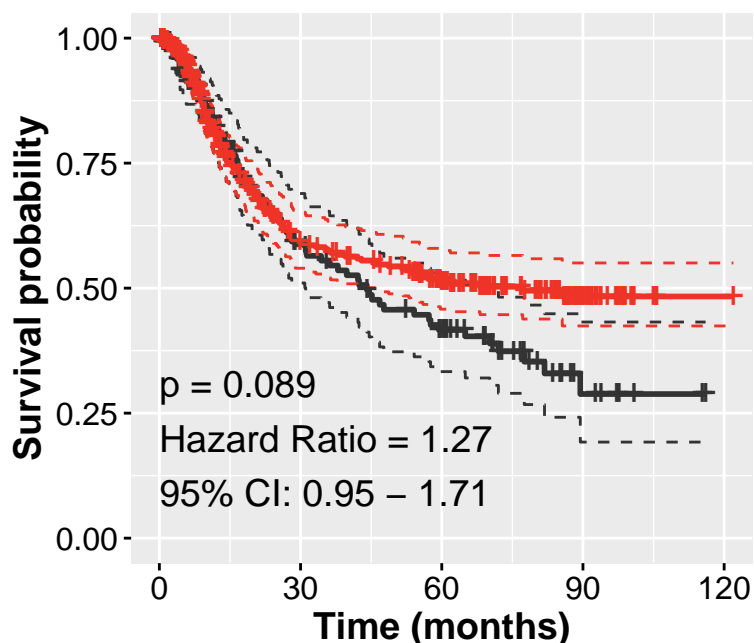

Figure S2. Subgroup analysis by clinical features to assess the prognostic value of the signature.

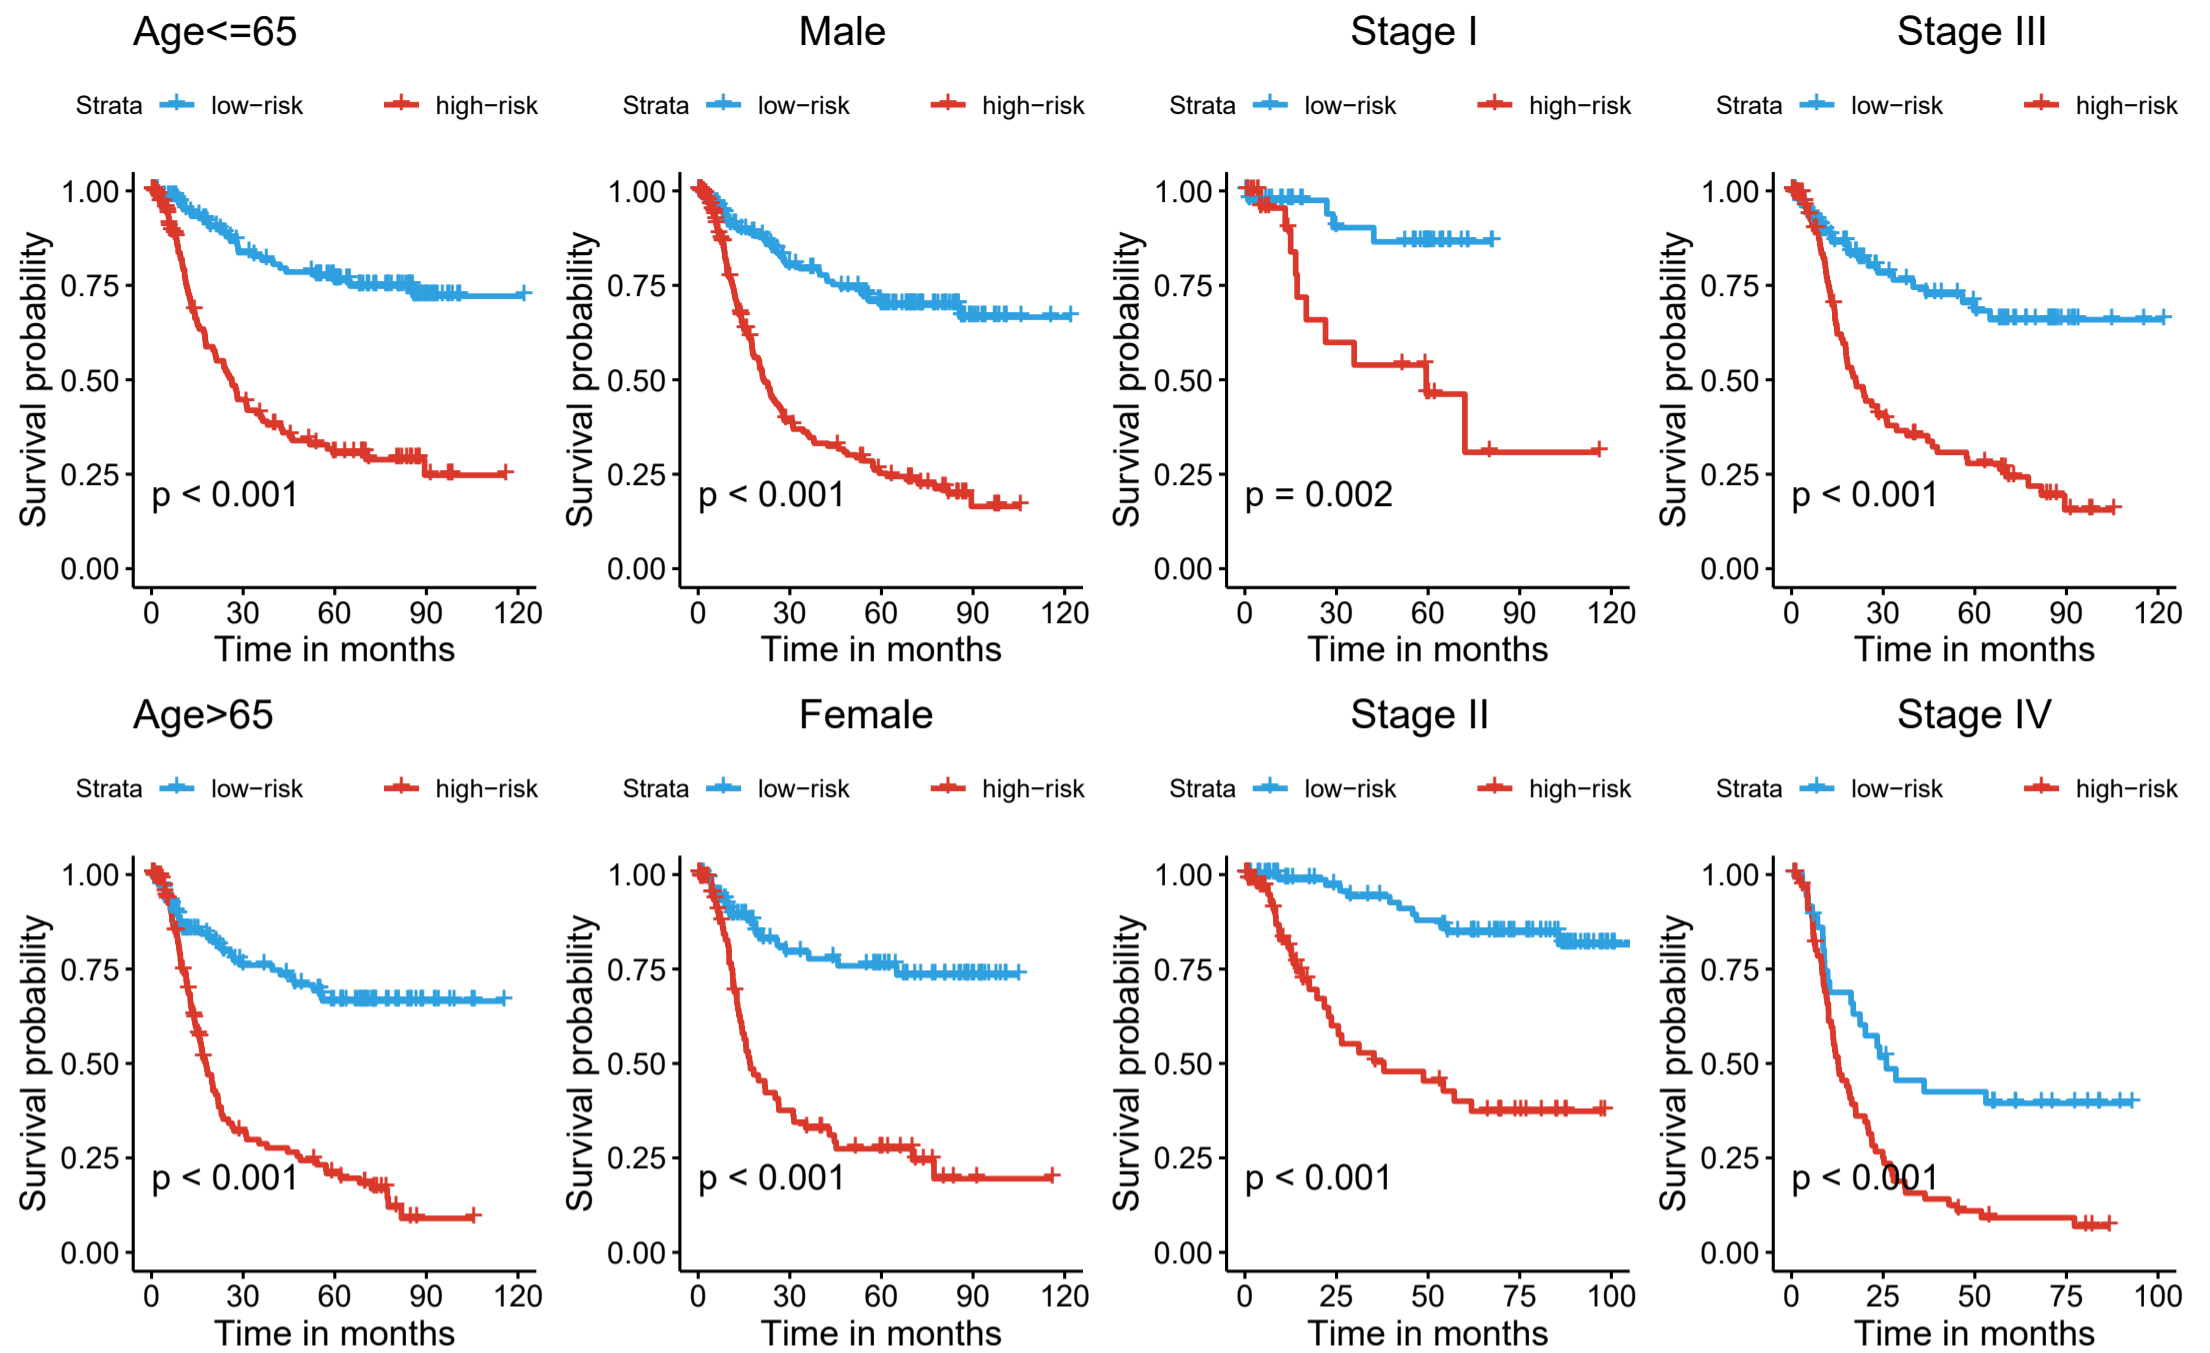

Figure S3. Extracellular matrix pathways positively associated with the infiltration of dendritic cells.

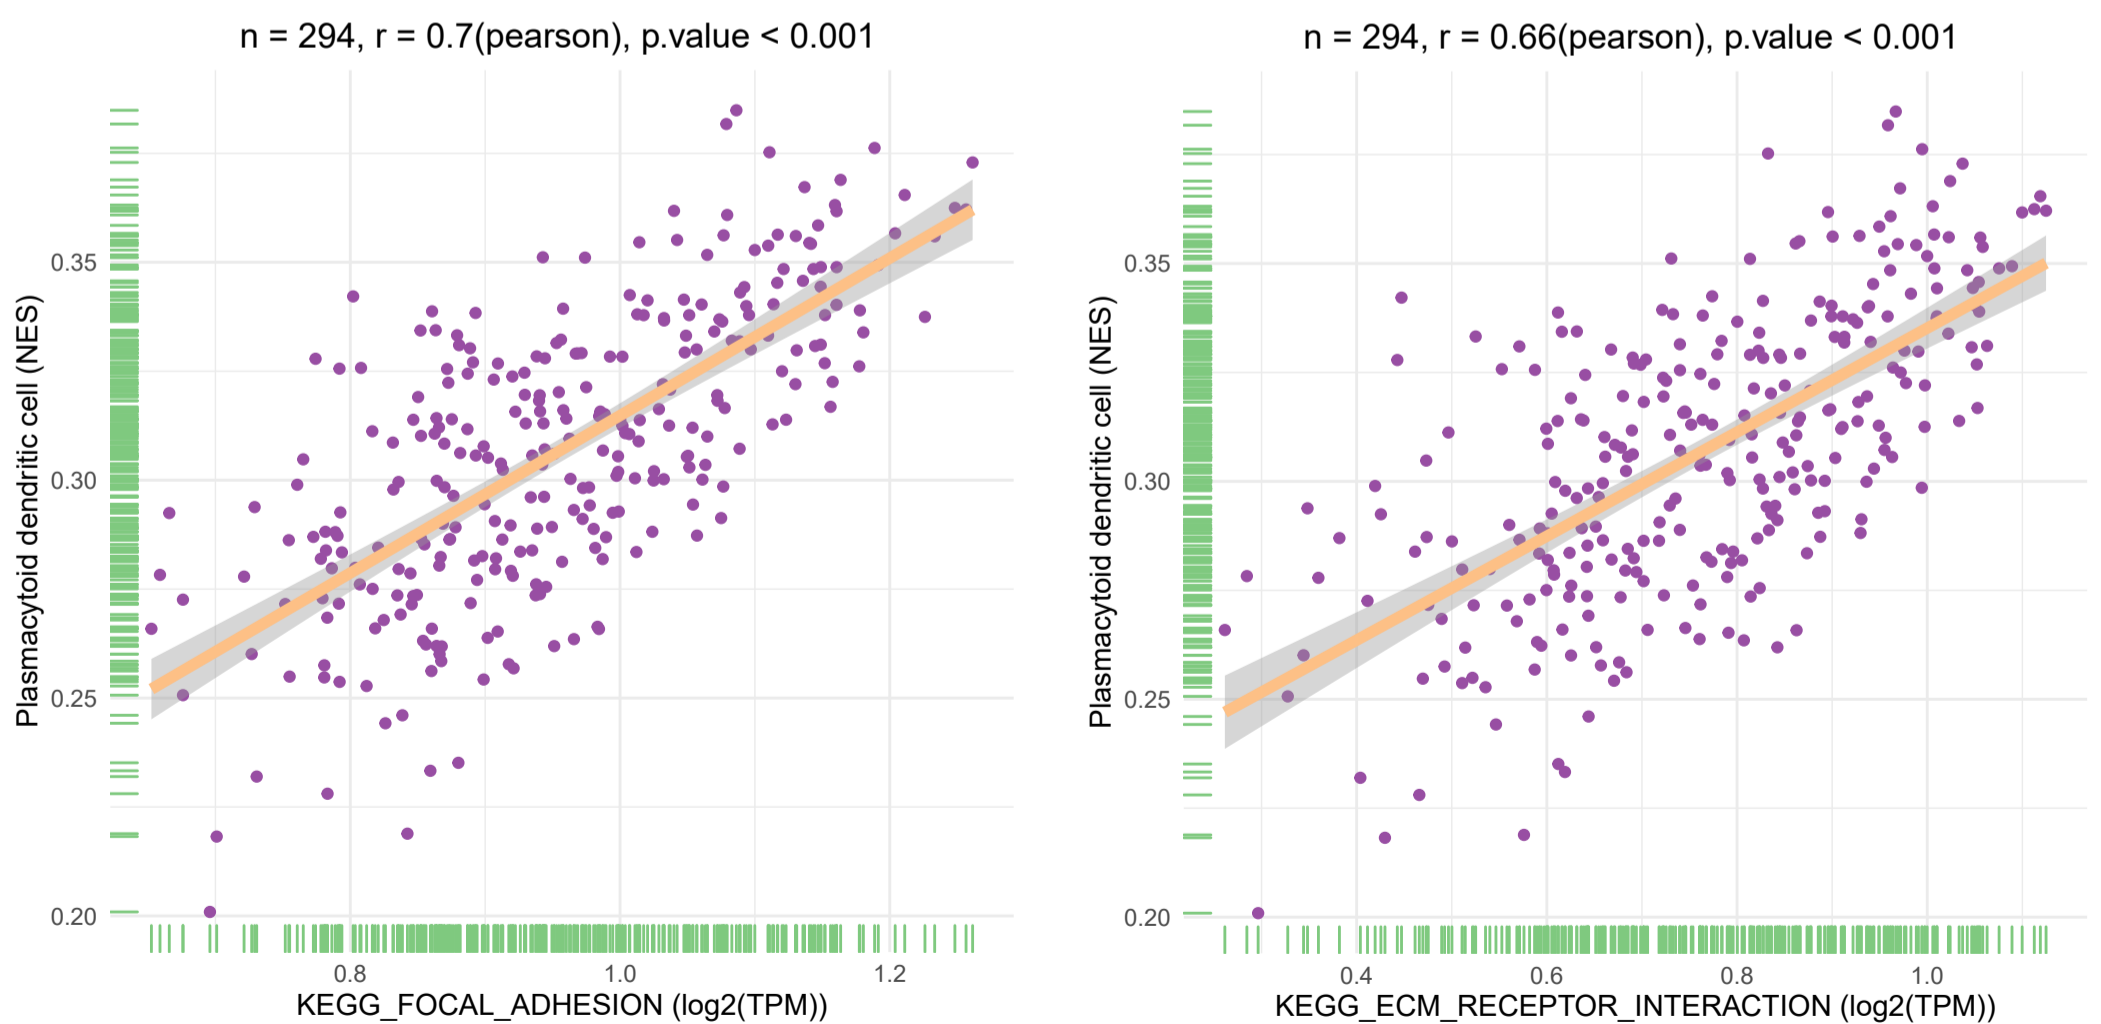

Supplement: Supplementary file 1 [file get_supplementary_file.php]
